# Supplementary material for: Visualizing molecular weights differences in supramolecular polymers
Source: PubMed Central journal article supplement — Proc Natl Acad Sci U S A. 2022 Feb 23;119(9):e2121746119. doi: 10.1073/pnas.2121746119 (PMC8892509; doi:10.1073/pnas.2121746119), 2022-02-23
Supplement: pnas.2121746119.sapp.pdf [file pnas.2121746119.sapp.pdf]

## Supplementary Information Appendix for:

### Visualizing molecular weights differences in supramolecular polymers

Qingyun Li<sup>a</sup>, Hanwei Zhang<sup>a</sup>, Kai Lou<sup>a</sup>, Yabi Yang<sup>a</sup>, Xiaofan Ji<sup>a,\*</sup>, Jintao Zhu<sup>a,\*</sup>, and Jonathan L. Sessler<sup>b,\*</sup>

\*Corresponding authors: Xiaofan Ji, Jintao Zhu, and Jonathan L. Sessler  
Email: xiaofanji@hust.edu.cn, jtzhu@mail.hust.edu.cn, sessler@cm.utexas.edu

#### This SI file Consists of:

Experimental section  
Synthesis section  
Figures S1 to S23  
Legends for Movies S1 to S2  
SI References

#### Other supplementary materials for this manuscript include the following:

Movies S1 and S2

#### Experimental section

**Materials and instruments.** All solvents and reagents were of the highest available grade available commercially and used without any further purification unless noted otherwise. Compound **1a** was purchased commercially. Compounds **1–3** were synthesized according to literature procedures (1, 2). <sup>1</sup>H NMR and <sup>13</sup>C NMR spectral studies were performed using either a Bruker Advance 400 or a Bruker Advance 500 MHz spectrometer. High-resolution electrospray ionization mass spectra (ESI-MS) were recorded using a Bruker microOTOF II. The melting points of synthetic compounds were collected on an Inesa WRS-1C device. The UV-vis absorption spectra were collected on a Shimadzu UV-2550 absorption spectrophotometer. Fluorescent emission spectra were recorded on a PerkinElmer LS55 fluorescence spectrophotometer. Viscometry data were measured using a Ubbelohde capillary viscometer immersed in a water bath at 25.0 °C. The inner diameter of the capillary was 0.710 mm.

**Scanning electron microscope (SEM).** All SEM test samples were prepared by spin coating the solution (10.0 μL) onto a silicon wafer substrate (size: 1.00 × 1.00 cm). Spin coating conditions:

3000 r/m, 120 seconds. The scanning electron microscopy (SEM) samples prepared in this way were tested on a Hitachi SU8010 instrument.

**Atomic force microscope (AFM).** All AFM test samples were prepared by dripping the solution onto a mica sheet substrate and then subjecting the coated solution to freeze-drying. Atomic force microscope (AFM) images were then captured on a Shimadzu SPM-9700 instrument.

**Laser scanning confocal microscopy (LSCM).** All test solutions (each 150  $\mu\text{L}$ ) were transferred to glass-bottomed cell culture dishes ( $\phi 15.0$  mm) at room temperature. Laser scanning confocal microscopic (LSCM) images were captured using an Olympus FV1200 setup using the highest energy available excitation wavelength (405 nm). The resulting outputs (the LSCM images) were obtained as digital false-color images (3), which were color-coded using the chromaticity of each sample under 405 nm irradiation as observed in the fluorescence spectrum. The fluorescence colors of LSCM images were generated using the fluorescence colors of **M1** +  $\text{Zn}(\text{OTf})_2$  solutions or **M1** solutions alone photographed under a 365 nm handheld UV lamp. The test samples of LSCM were made up in the same way as those used to take the photographs.

**Preparation of **M1** +  $\text{Zn}(\text{OTf})_2$  solutions.** Monomer **M1** (29.6 mg, 0.0248 mmol) was dissolved in 1.25 mL chloroform.  $\text{Zn}(\text{OTf})_2$  (8.80 mg, 0.0242 mmol) dissolved in 1.25 mL methanol was then added to the solution, and the mixture was stirred at room temperature for 1 h. This mixture solution was divided so as to have 50.0  $\mu\text{L}$  in various individual test tubes. After slow evaporation of the organic solvents at 298 K, the solid in each tube was dissolved in 500  $\mu\text{L}$  DMF/ $\text{H}_2\text{O}$  (1/4, v/v) to obtain a stock solution of **M1** +  $\text{Zn}(\text{OTf})_2$  (2.00 mM total concentration, 500  $\mu\text{L}$ ) in each tube. A series of **M1** +  $\text{Zn}(\text{OTf})_2$  solutions equimolar in each monomer (0.0800 – 1.80 mM total concentration) were prepared by diluting the **M1** +  $\text{Zn}(\text{OTf})_2$  stock solutions (2.00 mM) with DMF/ $\text{H}_2\text{O}$  (1/4, v/v).

**Preparation of **M1** solutions.** Monomer **M1** (29.6 mg, 0.0248 mmol) was dissolved in 1.25 mL chloroform and 1.25 mL methanol was then added. The mixture solution was divided so as to have 50.0  $\mu\text{L}$  in various individual test tubes. After evaporation of the organic solvents, the solid in each tube was dissolved in 500  $\mu\text{L}$  DMF/ $\text{H}_2\text{O}$  (1/4, v/v) to obtain stock solutions of **M1** (1.00 mM, 500  $\mu\text{L}$ ). A series of **M1** solutions (0.0400 – 0.900 mM) were prepared by diluting the **M1** stock solutions (1.00 mM) with DMF/ $\text{H}_2\text{O}$  (1/4, v/v).

## Synthesis section

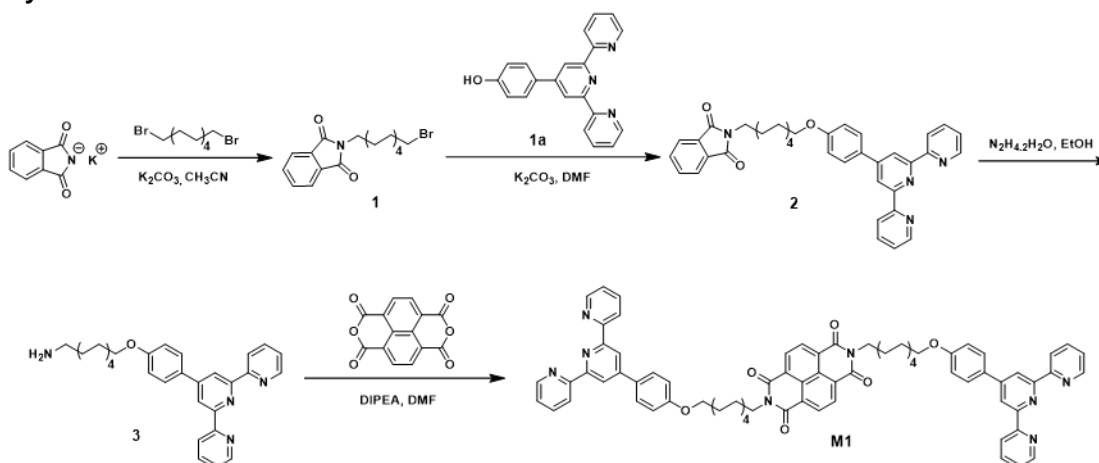

**Fig. S1.** Synthetic route to monomer **M1**.

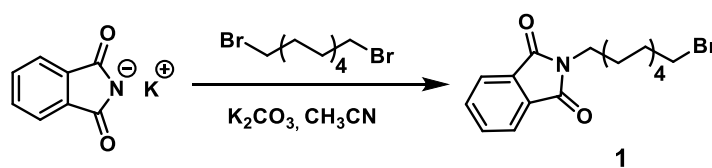

Phthalimide potassium salt (2.10 g, 11.3 mmol) and  $K_2CO_3$  (4.60 g, 33.3 mmol,) were dissolved in  $CH_3CN$  (40.0 mL), after which 1,10-dibromodecane (9.80 g, 32.7 mmol) was added to the solution. The mixture was then heated at reflux for 12 hours. The resulting mixture was filtered and the volatiles removed using a rotary evaporator. The crude product was purified by column chromatography (silica gel, petroleum ether/ethyl acetate = 6 : 1) to produce **1** as a white solid (3.80 g, 92.0%). Mp: 58.3 – 59.0 °C.  $^1H$  NMR (400 MHz,  $CDCl_3$ )  $\delta$  7.83 – 7.81 (m, 2H), 7.70 – 7.68 (m, 2H), 3.65 (t, 2H,  $J = 7.4$  Hz), 3.37 (t, 2H,  $J = 6.9$  Hz), 1.85 – 1.78 (m, 2H), 1.68 – 1.61 (m, 2H), 1.40 – 1.35 (m, 2H), 1.30 – 1.26 (m, 10H).  $^{13}C$  NMR (100 MHz,  $CDCl_3$ )  $\delta$  168.5, 133.9, 132.3, 123.2, 38.1, 34.1, 32.9, 29.4, 29.4, 29.2, 28.8, 28.7, 28.2, 26.9. HRMS (ESI<sup>+</sup>) Calcd for  $C_{18}H_{25}BrNO_2$  [M+H]<sup>+</sup>: 366.1069, found: 366.1063, error –1.6 ppm.

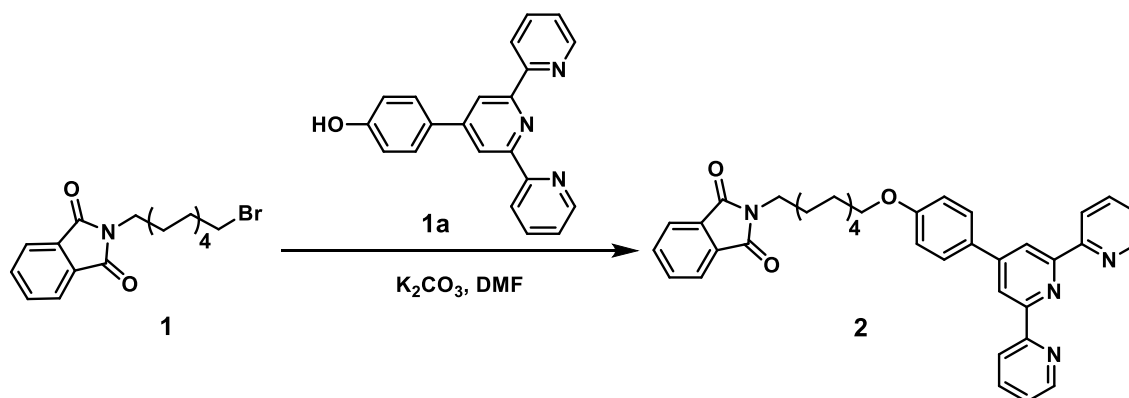

Compound **1a** (1.50 g, 4.62 mmol) and  $K_2CO_3$  (0.950 g, 6.88 mmol) were dissolved in DMF (10.0 mL) and then the solution was stirred at 25.0 °C for 30.0 minutes, after which the bromo-alkylating reagent **1** (2.50 g, 6.85 mmol) was added to the solution. The mixture was heated to 80 °C for 12 h under  $N_2$ . Then, the mixture was filtered and the filtrate was concentrated under reduced pressure to give a light yellow residue, which was subsequently recrystallized from  $CHCl_3$ /hexanes (3x) to give the alkylated product **2** (1.80 g, 63.8%). Mp: 136.4 – 138.1 °C.  $^1H$  NMR (400 MHz,  $CDCl_3$ )  $\delta$

8.73 (d, 2H,  $J = 4.0$  Hz), 8.70 (s, 2H), 8.67 (d, 2H,  $J = 7.9$  Hz), 7.89 – 7.82 (m, 6H), 7.70 – 7.68 (m, 2H), 7.34 (ddd, 2H,  $J = 7.4, 4.8, 1.0$  Hz), 7.01 (d, 2H,  $J = 8.8$  Hz), 4.02 (t, 2H,  $J = 6.5$  Hz), 3.68 (t, 2H,  $J = 7.4$  Hz), 1.84 – 1.77 (m, 2H), 1.70 – 1.61 (m, 2H), 1.49 – 1.44 (m, 2H), 1.34 – 1.33 (m, 10H).  $^{13}\text{C}$  NMR (100 MHz,  $\text{CDCl}_3$ )  $\delta$  168.6, 160.3, 156.6, 156.0, 150.0, 149.3, 137.0, 134.0, 132.3, 130.6, 128.6, 123.9, 123.3, 121.5, 118.4, 115.0, 68.2, 38.2, 29.6, 29.5, 29.5, 29.4, 29.3, 28.7, 27.0, 26.2. HRMS (ESI<sup>+</sup>) Calcd for  $\text{C}_{39}\text{H}_{39}\text{N}_4\text{O}_3$  [M+H]<sup>+</sup>: 611.3022, found: 611.3021, error –0.16 ppm.

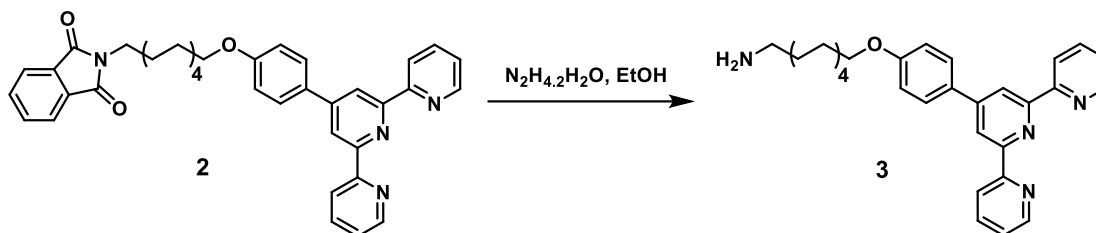

Hydrazine hydrate (450 mg, 8.99 mmol) and compound **2** (1.80 g, 2.95 mmol) were suspended in EtOH (50.0 mL) and heated at reflux for 12 h. After cooling and concentrating *in vacuo*, the residue was partitioned between  $\text{CH}_2\text{Cl}_2$  and  $\text{H}_2\text{O}$ . The aqueous layer was extracted (3 $\times$ ) with  $\text{CH}_2\text{Cl}_2$  and the combined organic layer was washed with brine, dried ( $\text{MgSO}_4$ ), and then recrystallized from  $\text{CH}_2\text{Cl}_2$ /hexanes (3 $\times$ ) to give **3** as a white solid (1.10 g, 78.0%). Mp: 102.3 – 103.9 °C.  $^1\text{H}$  NMR (500 MHz,  $\text{CDCl}_3$ )  $\delta$  8.73 (d, 2H,  $J = 4.7$  Hz), 8.70 (s, 2H), 8.66 (d, 2H,  $J = 7.9$  Hz), 7.89 – 7.85 (m, 4H), 7.34 (ddd, 2H,  $J = 7.4, 4.8, 0.8$  Hz), 7.01 (d, 2H,  $J = 8.8$  Hz), 4.02 (t, 2H,  $J = 6.5$  Hz), 2.68 (t, 2H,  $J = 7.0$  Hz), 1.84 – 1.79 (m, 2H), 1.57 (s, 2H), 1.50 – 1.43 (m, 4H), 1.38 – 1.31 (m, 10H).  $^{13}\text{C}$  NMR (125 MHz,  $\text{CDCl}_3$ )  $\delta$  160.2, 156.5, 155.9, 149.9, 149.2, 137.0, 130.6, 128.6, 123.9, 121.5, 118.4, 115.0, 68.3, 42.4, 34.0, 29.7, 29.7, 29.6, 29.5, 29.4, 27.0, 26.2. HRMS (ESI<sup>+</sup>) Calcd for  $\text{C}_{31}\text{H}_{34}\text{N}_4\text{O}$  [M+H]<sup>+</sup>: 481.2967, found: 481.2961, error –1.3 ppm.

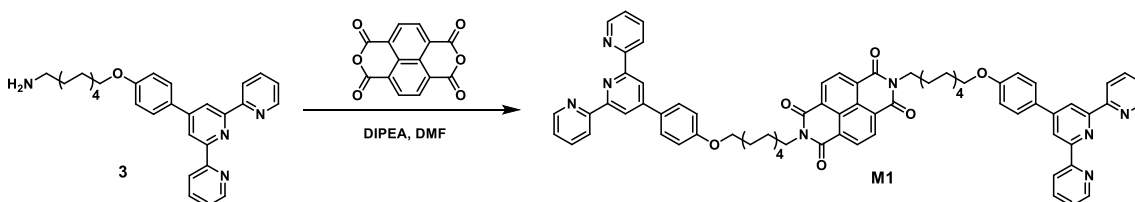

1,4,5,8-Naphthalenetetracarboxylic dianhydride (268 mg, 1.00 mmol) and compound **3** (1.10 g, 2.29 mmol) were dissolved in DMF (80.0 mL). *N,N*-Diisopropylethylamine (284 mg, 2.20 mmol) was then added to the reaction mixture, which was then heated to 100 °C and maintained at that temperature for 12 h. The reaction mixture was then cooled to –20 °C to separate out a yellow solid, which was subsequently recrystallized from  $\text{CH}_2\text{Cl}_2$ /hexanes (3 $\times$ ) to give **M1** as a yellow solid (600 mg, 50.3%). Mp: 187.9 – 190.3 °C.  $^1\text{H}$  NMR (400 MHz,  $\text{CDCl}_3$ )  $\delta$  8.72 (d, 4H,  $J = 4.1$  Hz), 8.68 (s, 8H), 8.64 (d, 4H,  $J = 8.0$  Hz), 7.90 – 7.85 (m, 8H), 7.35 (dd, 4H,  $J = 6.5, 5.1$  Hz), 7.01 (d, 4H,  $J = 8.7$  Hz), 4.13 (t, 4H,  $J = 7.6$  Hz), 4.02 (t, 4H,  $J = 6.4$  Hz), 1.85 – 1.78 (m, 4H), 1.74 – 1.68 (m, 4H), 1.50 – 1.35 (m, 24H).  $^{13}\text{C}$  NMR (100 MHz,  $\text{CDCl}_3$ )  $\delta$  162.9, 160.3, 156.4, 155.8, 149.9, 149.1, 137.1, 131.0, 130.4, 128.6, 126.8, 126.7, 123.9, 121.5, 118.4, 115.0, 68.2, 40.7, 29.5, 29.4, 29.3, 29.3, 29.3, 28.2, 27.2, 26.1. HRMS (ESI<sup>+</sup>) Calcd for  $\text{C}_{76}\text{H}_{73}\text{N}_8\text{O}_6$  [M+H]<sup>+</sup>: 1193.5653, found: 1193.5652, error –0.08 ppm.

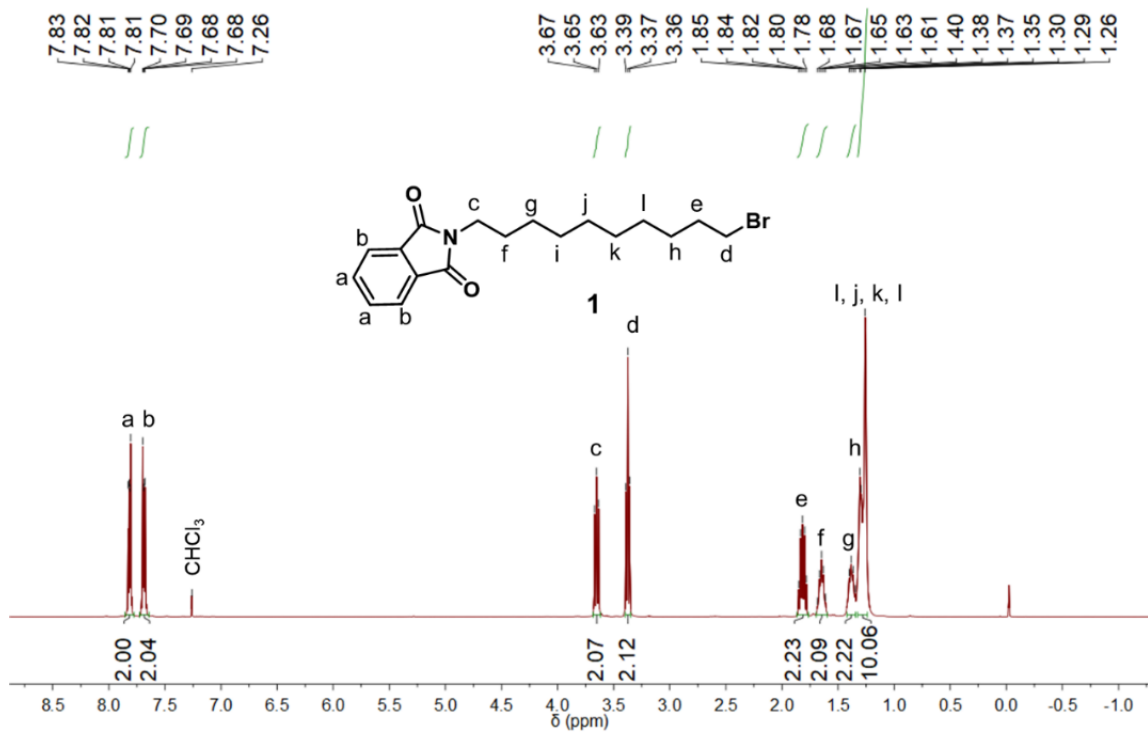

**Fig. S2.** <sup>1</sup>H NMR spectrum (CDCl<sub>3</sub>, 400 MHz, 298 K) of compound 1.

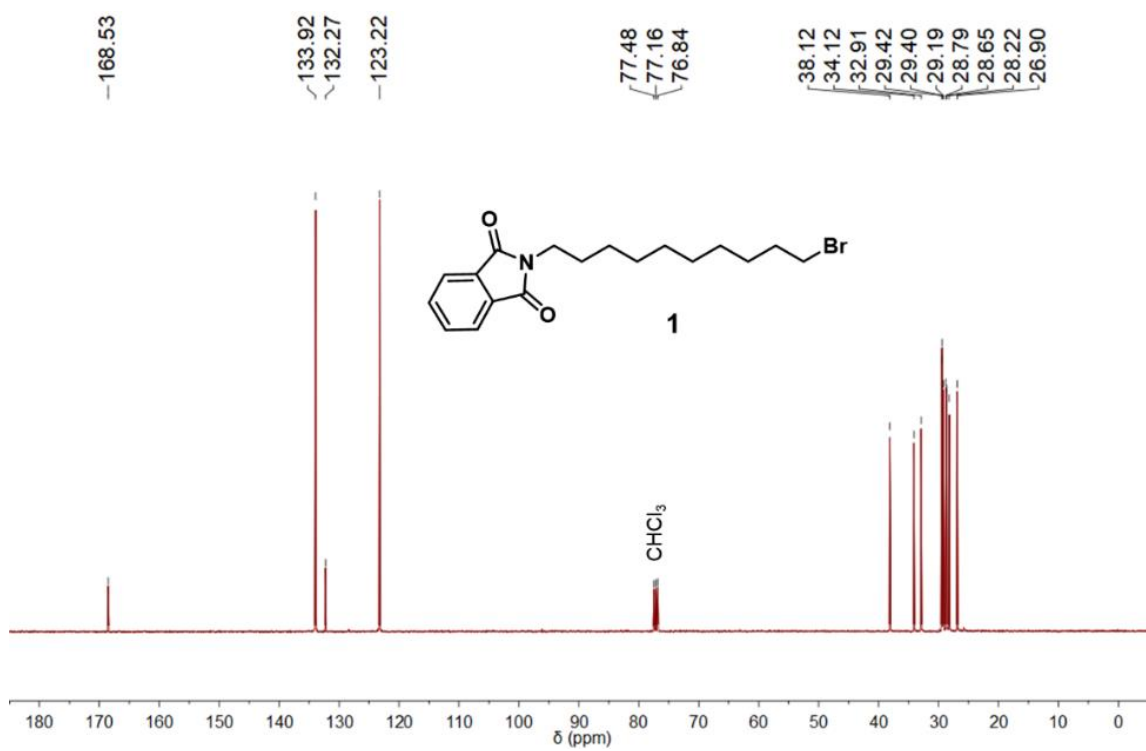

**Fig. S3.**  $^{13}\text{C}$  NMR spectrum (CDCl<sub>3</sub>, 100 MHz, 298 K) of compound 1.

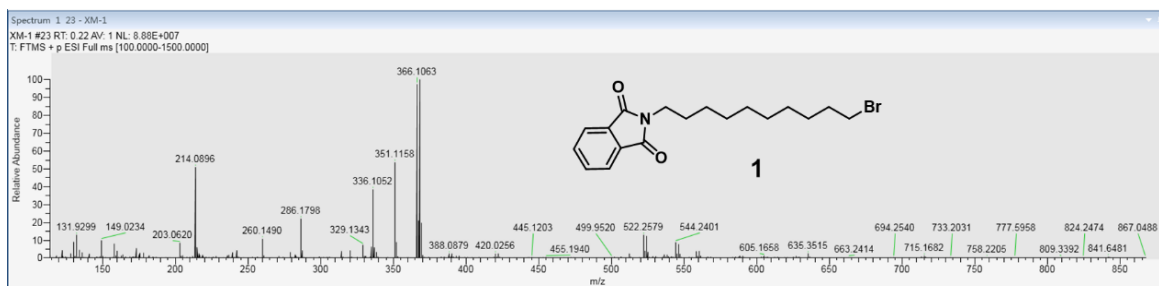

Fig. S4. HR-ESI<sup>+</sup>-MS spectrum of compound 1.

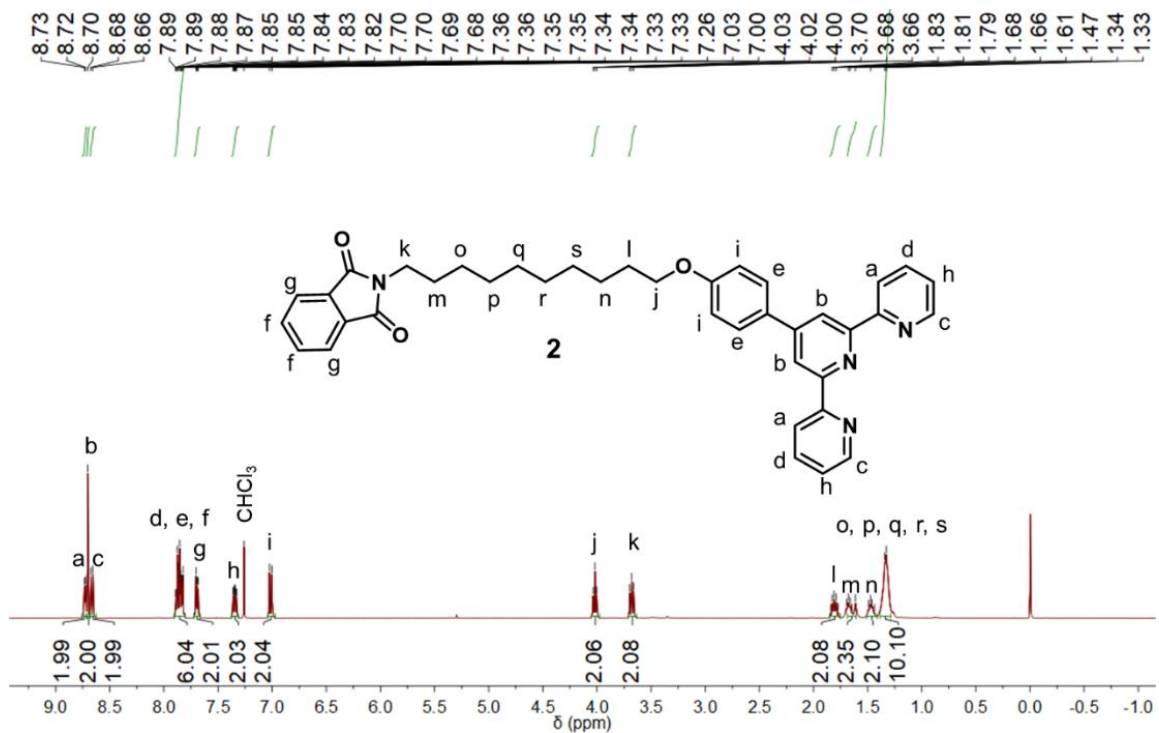

**Fig. S5.** <sup>1</sup>H NMR spectrum (CDCl<sub>3</sub>, 400 MHz, 298 K) of compound **2**.



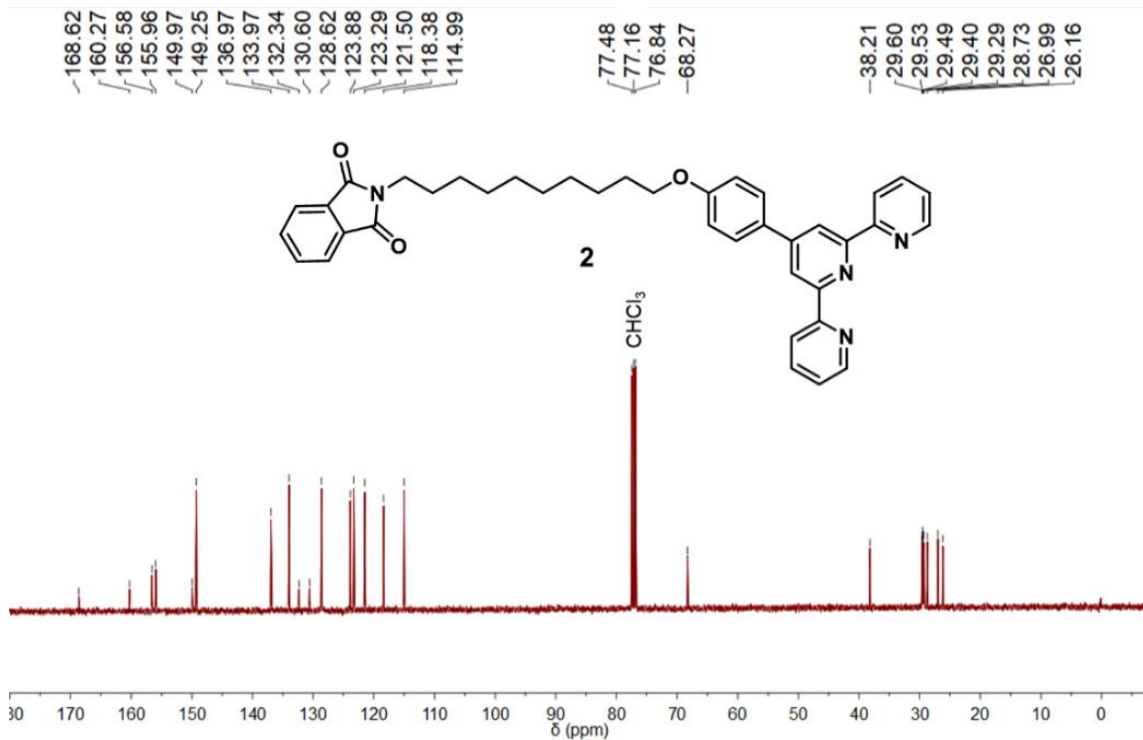

**Fig. S6.**  $^{13}\text{C}$  NMR spectrum (CDCl<sub>3</sub>, 100 MHz, 298 K) of compound 2.

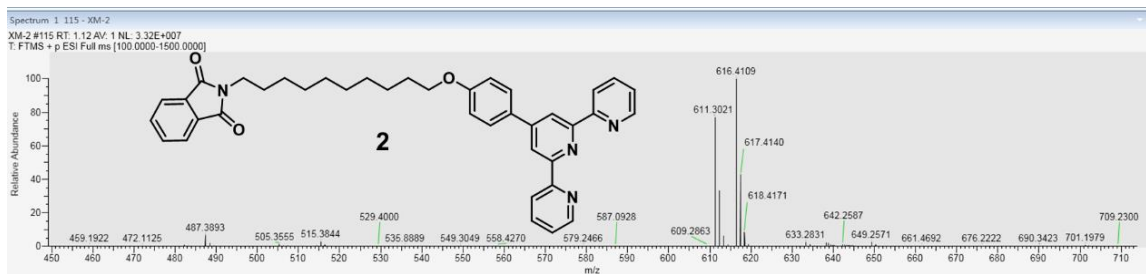

**Fig. S7.** HR-ESI<sup>+</sup>-MS spectrum of compound **2**.

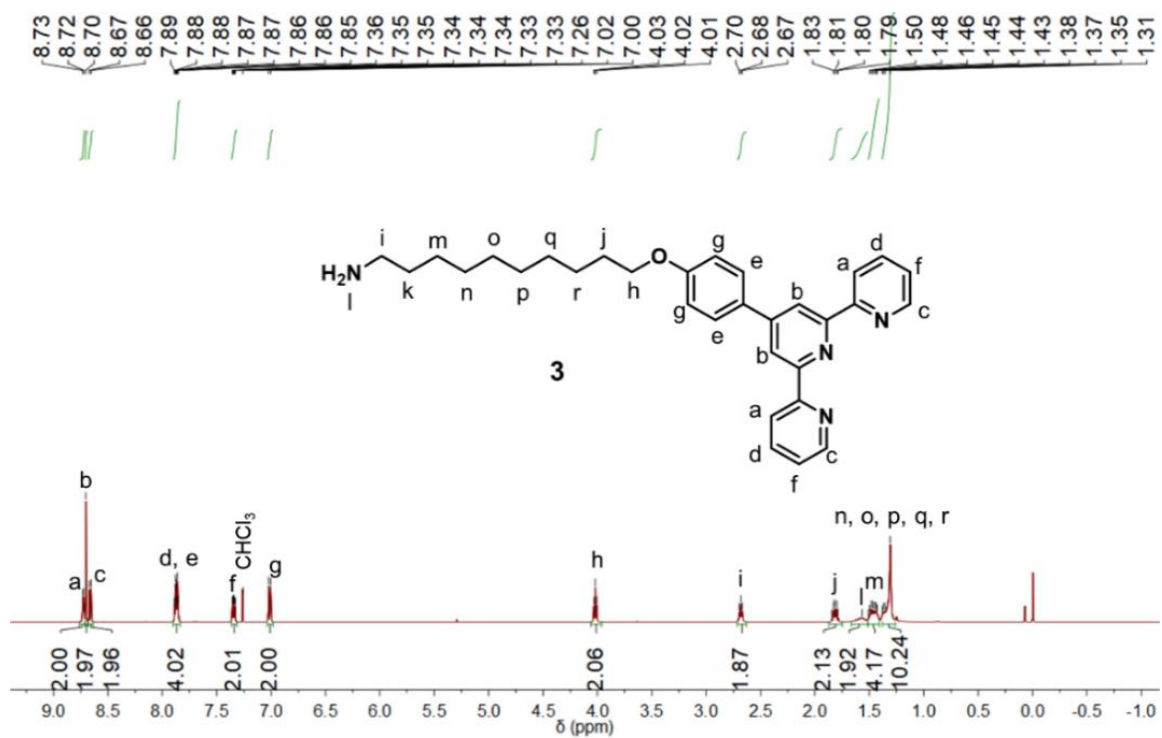

**Fig. S8.** <sup>1</sup>H NMR spectrum (CDCl<sub>3</sub>, 500 MHz, 298 K) of compound **3**.

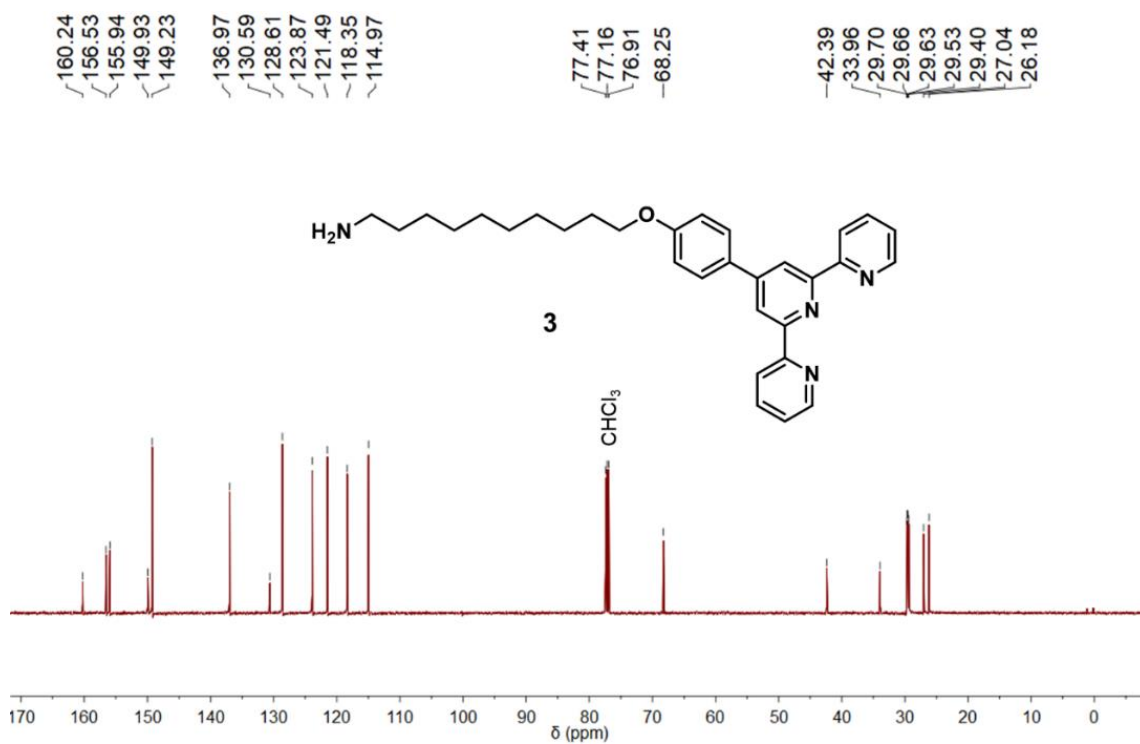

**Fig. S9.**  $^{13}\text{C}$  NMR spectrum (CDCl<sub>3</sub>, 125 MHz, 298 K) of compound **3**.

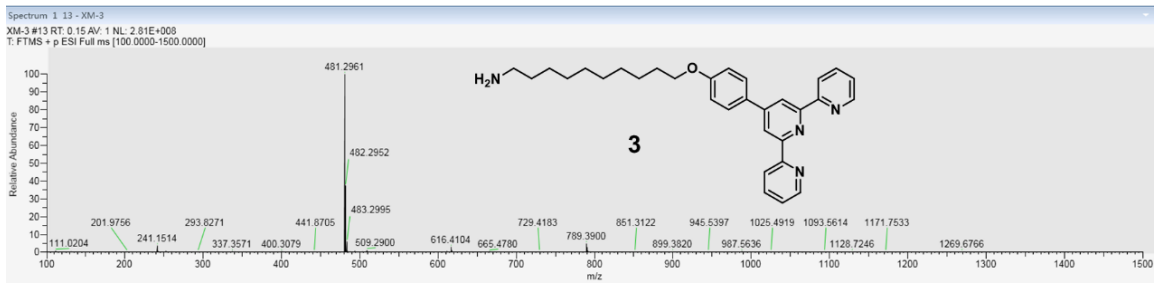

Fig. S10. HR-ESI<sup>+</sup>-MS spectrum of compound 3.

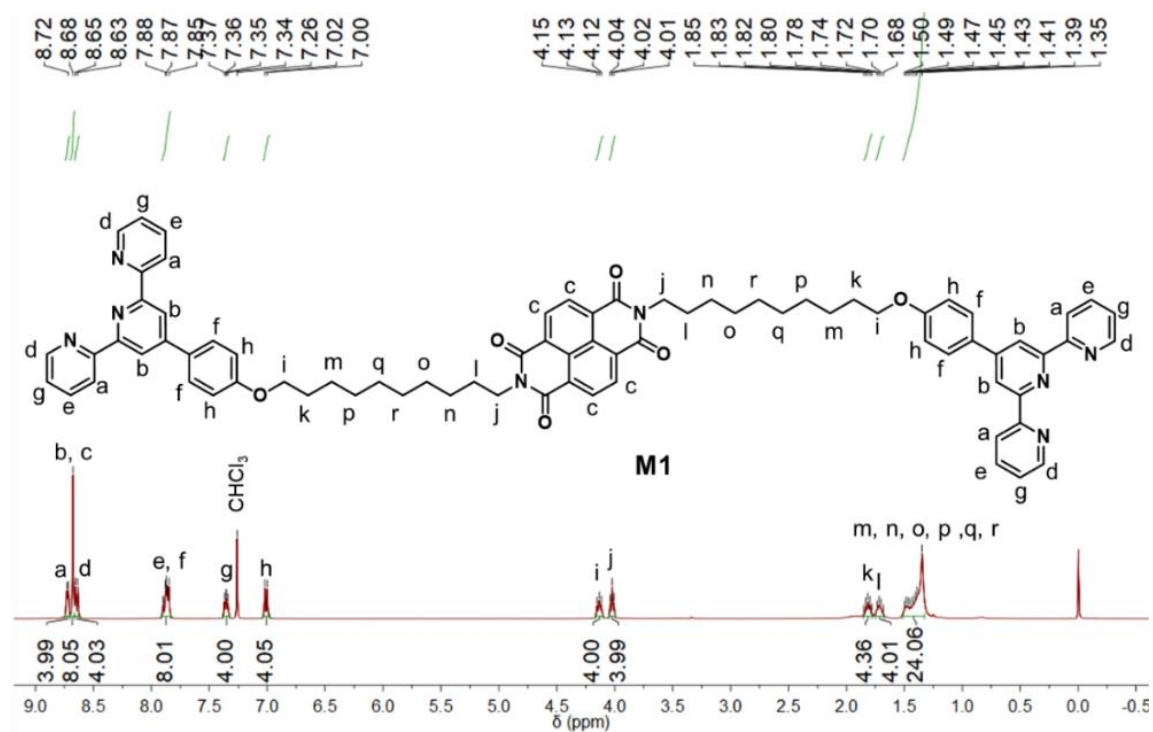

**Fig. S11.** <sup>1</sup>H NMR spectrum (CDCl<sub>3</sub>, 400 MHz, 298 K) of **M1**.

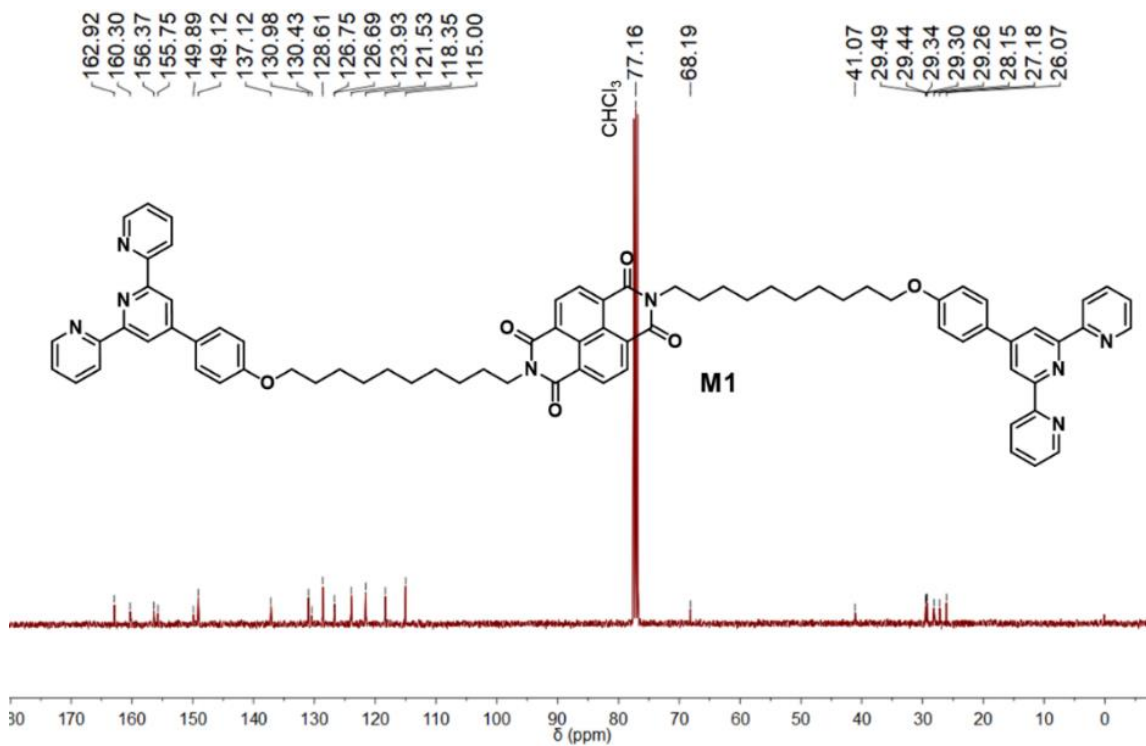

**Fig. S12.**  $^{13}\text{C}$  NMR spectrum (CDCl<sub>3</sub>, 100 MHz, 298 K) of M1.

**Acquisition Parameter**

|             |          |                      |          |                  |           |
|-------------|----------|----------------------|----------|------------------|-----------|
| Source Type | ESI      | Ion Polarity         | Positive | Set Nebulizer    | 0.3 Bar   |
| Focus       | Active   |                      |          | Set Dry Heater   | 180 °C    |
| Scan Begin  | 50 m/z   | Set Capillary        | 4500 V   | Set Dry Gas      | 4.0 l/min |
| Scan End    | 3000 m/z | Set End Plate Offset | -500 V   | Set Divert Valve | Waste     |

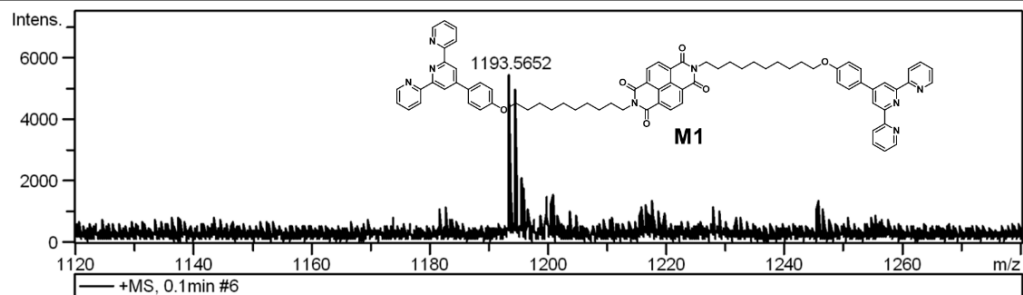

| # | m/z       | Res.  | S/N  | I    | FWHM   |
|---|-----------|-------|------|------|--------|
| 1 | 1193.5652 | 11229 | 18.8 | 5480 | 0.1063 |
| 2 | 1194.5668 | 12141 | 16.9 | 4645 | 0.0984 |

**Fig. S13.** HR-ESI<sup>+</sup>-MS spectrum of **M1**.



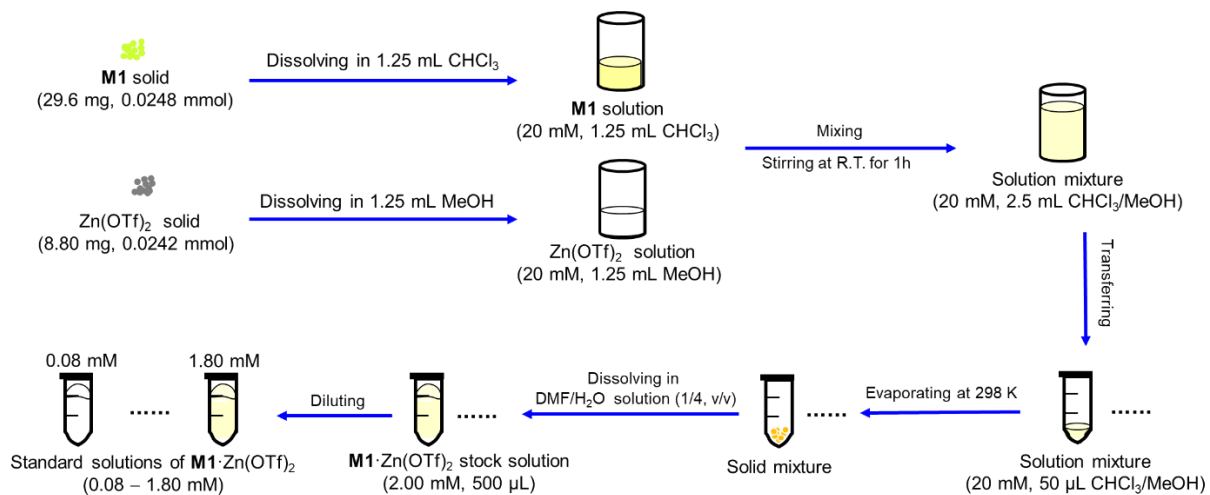

**Fig. S14.** Flow diagram showing the preparation of various **M1** +  $\text{Zn}(\text{OTf})_2$  solutions.

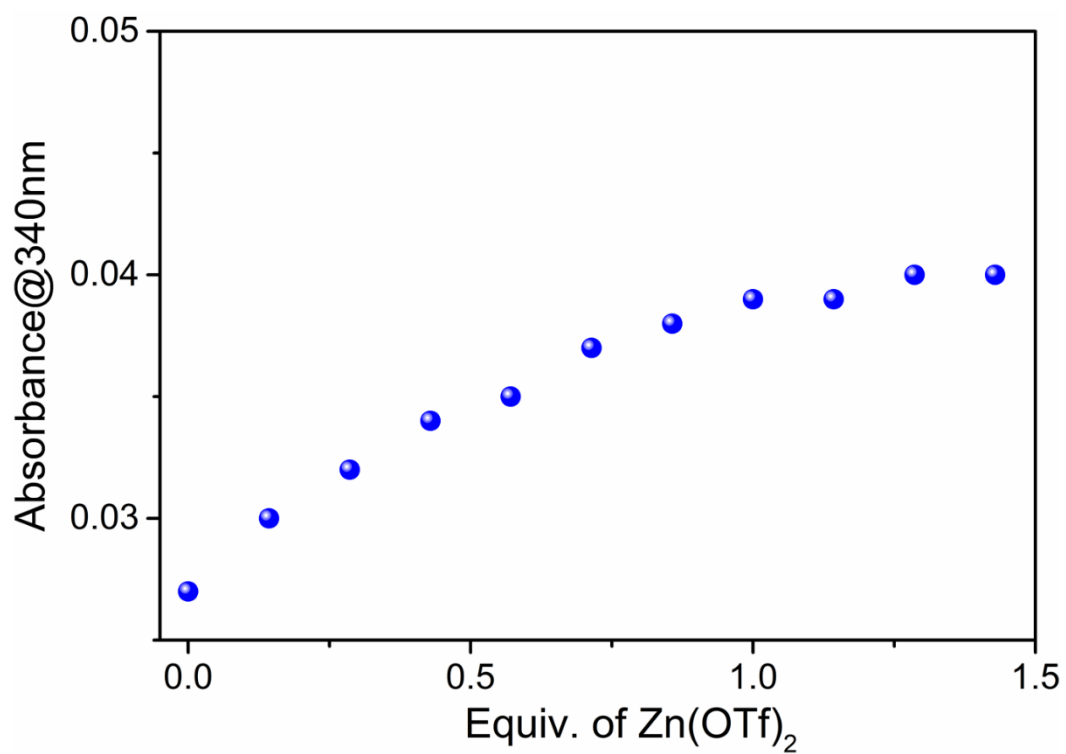

**Fig. S15.** Plot of the absorbance at 340 nm versus the number of Zn(OTf)<sub>2</sub> equivalents.

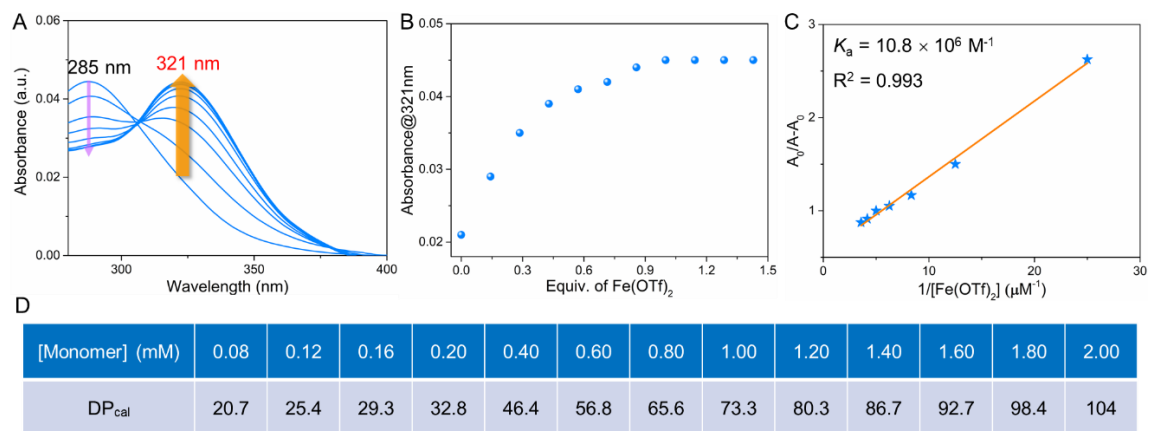

**Fig. S16.** (A) UV-vis spectra of compound **1a** (0.280  $\mu\text{M}$ ) in 1.00 mL DMF/H<sub>2</sub>O (1/4, v/v) recorded upon the stepwise addition of Fe(OTf)<sub>2</sub> (100  $\mu\text{M}$ ) at 298 K. (B) Plot of the absorbance at 321 nm versus the number of Fe(OTf)<sub>2</sub> equivalents. (C) Plot of  $(A_0/(A-A_0))$  as a function of  $1/[\text{Fe}(\text{OTf})_2]$ . The apparent association constant  $K_a$  corresponding to the interaction between **1a** (0.280  $\mu\text{M}$ ) and Fe(OTf)<sub>2</sub> (100  $\mu\text{M}$ ) was determined using the Benesi-Hildebrand equation  $A_0/(A-A_0) = (A_0/(A_{max} - A_0))((1/K_a) [\text{Fe}(\text{OTf})_2]^{-1} + 1)$ . (D) The degree of polymerization calculated (DP<sub>cal</sub>) for equimolar mixtures of **M1** and Fe(OTf)<sub>2</sub> (0.08 – 2.00 mM).

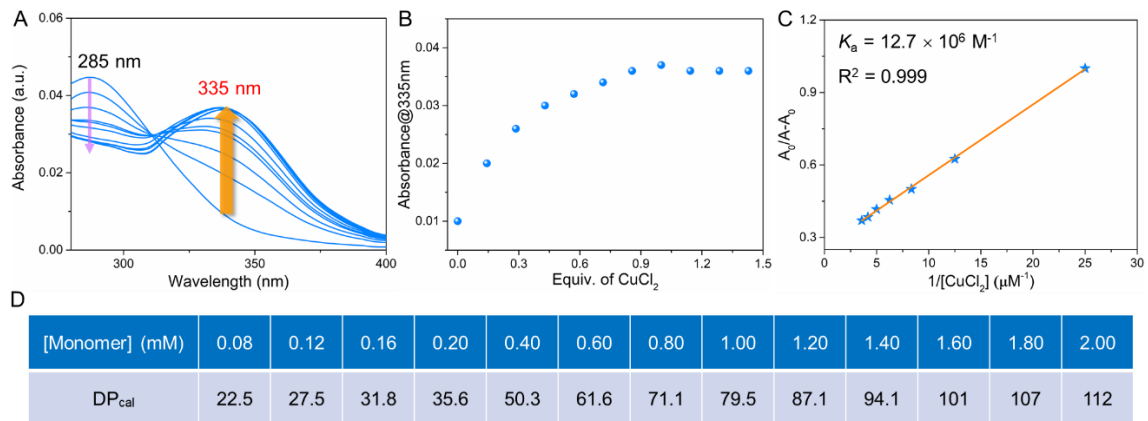

**Fig. S17.** (A) UV-vis spectra of compound **1a** (0.280  $\mu\text{M}$ ) in 1.00 mL DMF/H<sub>2</sub>O (1/4, v/v) recorded upon the stepwise addition of CuCl<sub>2</sub> (100  $\mu\text{M}$ ) at 298 K. (B) Plot of the absorbance at 335 nm versus the number of CuCl<sub>2</sub> equivalents. (C) Plot of  $A_0/(A-A_0)$  as a function of  $1/[\text{CuCl}_2]$ . The apparent association constant  $K_a$  corresponding to the interaction between **1a** (0.280  $\mu\text{M}$ ) and CuCl<sub>2</sub> (100  $\mu\text{M}$ ) was determined using the Benesi-Hilderbrand equation  $A_0/(A-A_0) = (A_0/(A_{max} - A_0))((1/K_a)[\text{CuCl}_2]^{-1} + 1)$ . (D) The degree of polymerization calculated (DP<sub>cal</sub>) for equimolar mixtures of **M1** and CuCl<sub>2</sub> (0.08 – 2.00 mM).

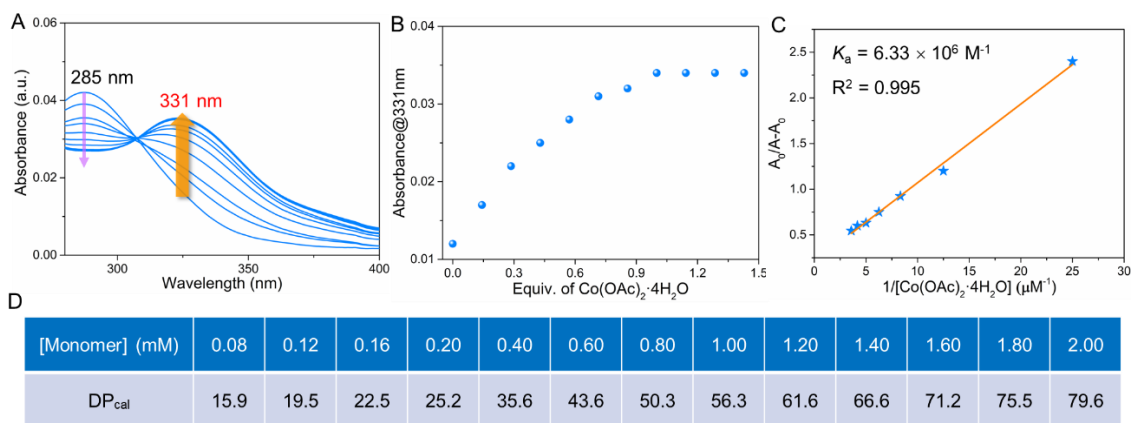

**Fig. S18.** (A) UV-vis spectra of compound **1a** (0.280  $\mu\text{M}$ ) in 1.00 mL DMF/H<sub>2</sub>O (1/4, v/v) recorded upon the stepwise addition of Co(OAc)<sub>2</sub>·4H<sub>2</sub>O (100  $\mu\text{M}$ ) at 298 K. (B) Plot of the absorbance at 331 nm versus the number of Co(OAc)<sub>2</sub>·4H<sub>2</sub>O equivalents. (C) Plot of  $A_0/(A-A_0)$  as a function of  $1/[\text{Co(OAc)}_2\cdot 4\text{H}_2\text{O}]$ . The apparent association constant  $K_a$  corresponding to the interaction between **1a** (0.280  $\mu\text{M}$ ) and Co(OAc)<sub>2</sub>·4H<sub>2</sub>O (100  $\mu\text{M}$ ) was determined using the Benesi-Hilderbrand equation  $A_0/(A-A_0) = (A_0/(A_{max} - A_0))((1/K_a) [\text{Co(OAc)}_2\cdot 4\text{H}_2\text{O}]^{-1} + 1)$ . (D) The degree of polymerization calculated (DP<sub>cal</sub>) for equimolar mixtures of **M1** and Co(OAc)<sub>2</sub>·4H<sub>2</sub>O (0.08 – 2.00 mM).

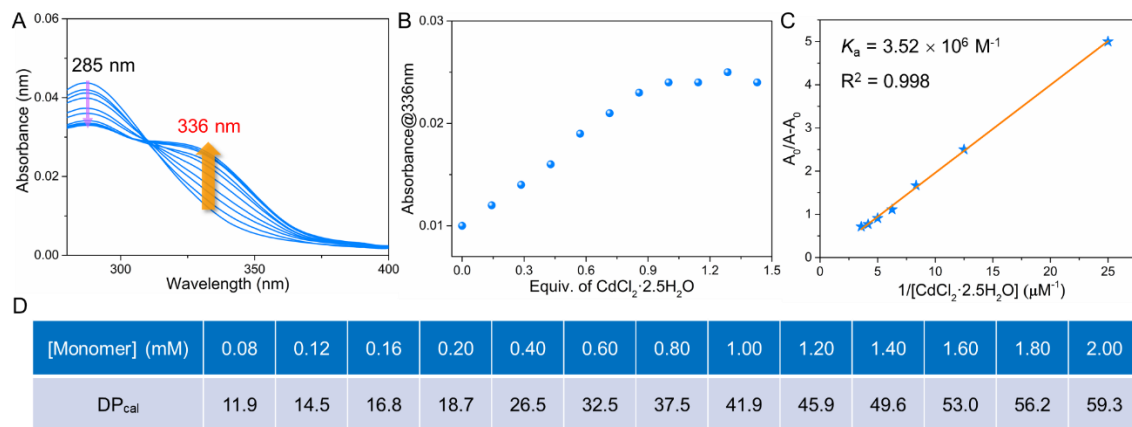

**Fig. S19.** (A) UV-vis spectra of compound **1a** (0.280  $\mu\text{M}$ ) in 1.00 mL DMF/H<sub>2</sub>O (1/4, v/v) recorded upon the stepwise addition of CdCl<sub>2</sub>·2.5H<sub>2</sub>O (100  $\mu\text{M}$ ) at 298 K. (B) Plot of the absorbance at 336 nm versus the number of CdCl<sub>2</sub>·2.5H<sub>2</sub>O equivalents. (C) Plot of  $(A_0/(A-A_0))$  as a function of  $1/[\text{CdCl}_2\cdot 2.5\text{H}_2\text{O}]$ . The apparent association constant  $K_a$  corresponding to the interaction between **1a** (0.280  $\mu\text{M}$ ) and CdCl<sub>2</sub>·2.5H<sub>2</sub>O (100  $\mu\text{M}$ ) was determined using the Benesi-Hilderbrand equation  $A_0/(A-A_0) = (A_0/(A_{max} - A_0))((1/K_a) [\text{CdCl}_2\cdot 2.5\text{H}_2\text{O}]^{-1} + 1)$ . (D) The degree of polymerization calculated (DP<sub>cal</sub>) for equimolar mixtures of **M1** and CdCl<sub>2</sub>·2.5H<sub>2</sub>O (0.08 – 2.00 mM).

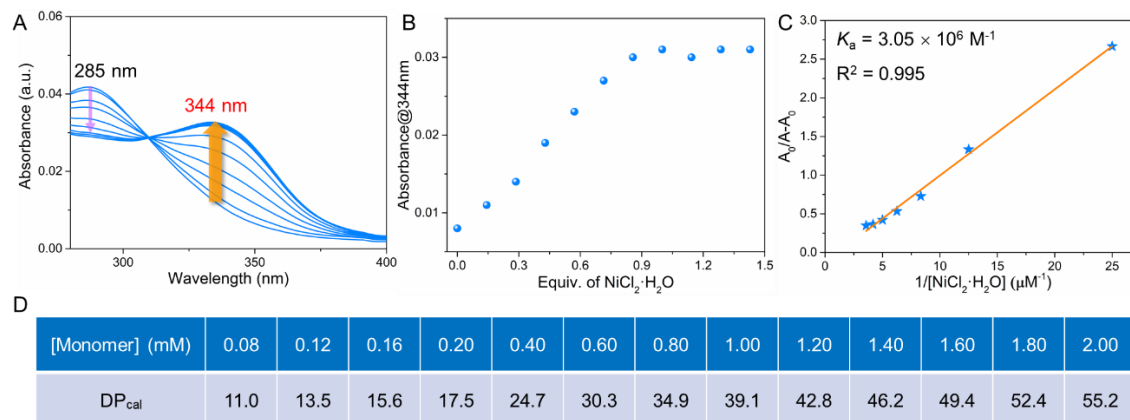

**Fig. S20.** (A) UV-vis spectra of compound **1a** (0.280  $\mu\text{M}$ ) in 1.00 mL DMF/H<sub>2</sub>O (1/4, v/v) recorded upon the stepwise addition of NiCl<sub>2</sub>·H<sub>2</sub>O (100  $\mu\text{M}$ ) at 298 K. (B) Plot of the absorbance at 344 nm versus the number of NiCl<sub>2</sub>·H<sub>2</sub>O equivalents. (C) Plot of  $(A_0/(A-A_0))$  as a function of  $1/[\text{NiCl}_2\cdot\text{H}_2\text{O}]$ . The apparent association constant  $K_a$  corresponding to the interaction between **1a** (0.280  $\mu\text{M}$ ) and NiCl<sub>2</sub>·H<sub>2</sub>O (100  $\mu\text{M}$ ) was determined using the Benesi-Hilderbrand equation  $A_0/(A-A_0) = (A_0/(A_{\text{max}} - A_0))((1/K_a) [\text{NiCl}_2\cdot\text{H}_2\text{O}]^{-1} + 1)$ . (D) The degree of polymerization calculated (DP<sub>cal</sub>) for equimolar mixtures of **M1** and NiCl<sub>2</sub>·H<sub>2</sub>O (0.08 – 2.00 mM).

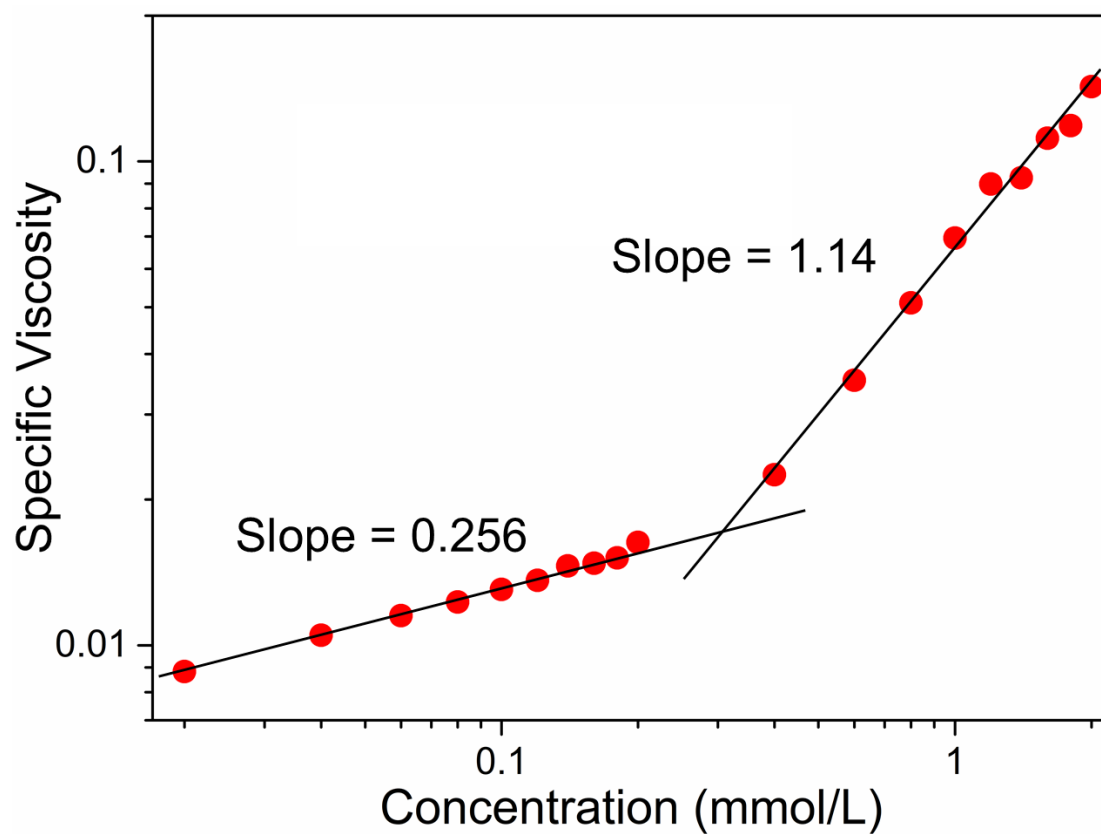

**Fig. S21.** Plot of the specific viscosity of equimolar mixtures of **M1** + Zn(OTf)<sub>2</sub> in DMF/H<sub>2</sub>O (1/4, v/v) versus their concentration at 298 K.



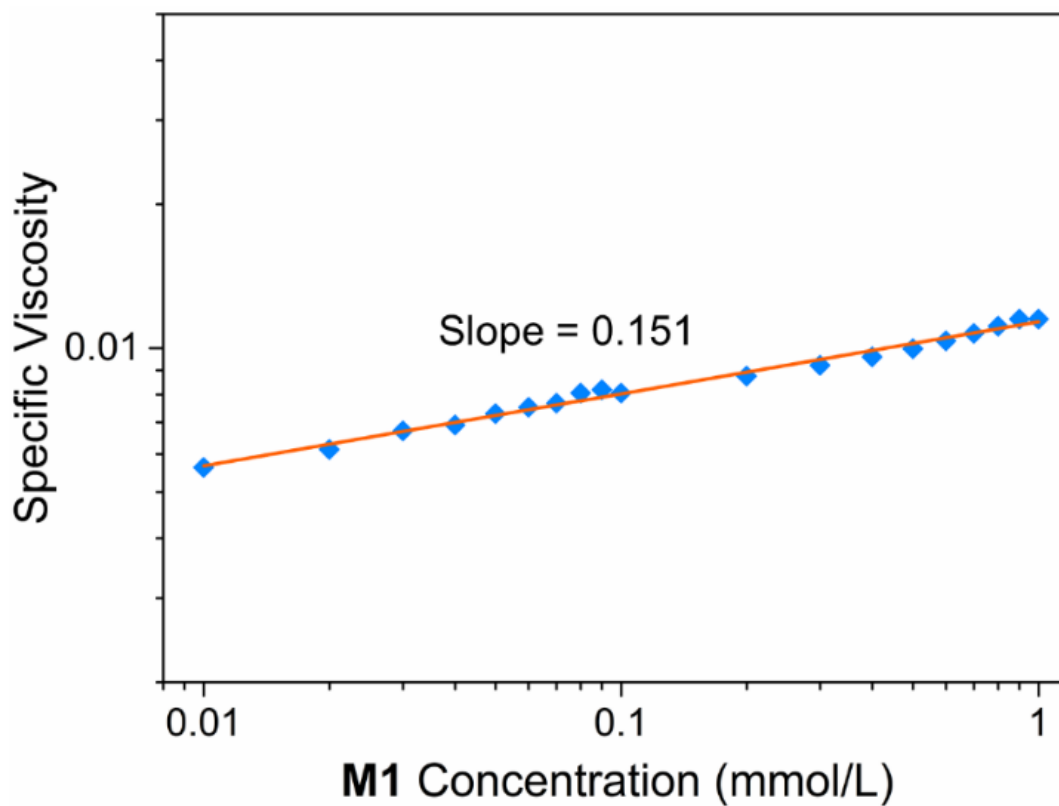

**Fig. S22.** Log-log plot of the specific viscosity of **M1** solutions (DMF/H<sub>2</sub>O = 1/4, v/v) (298 K) versus the monomer concentration.

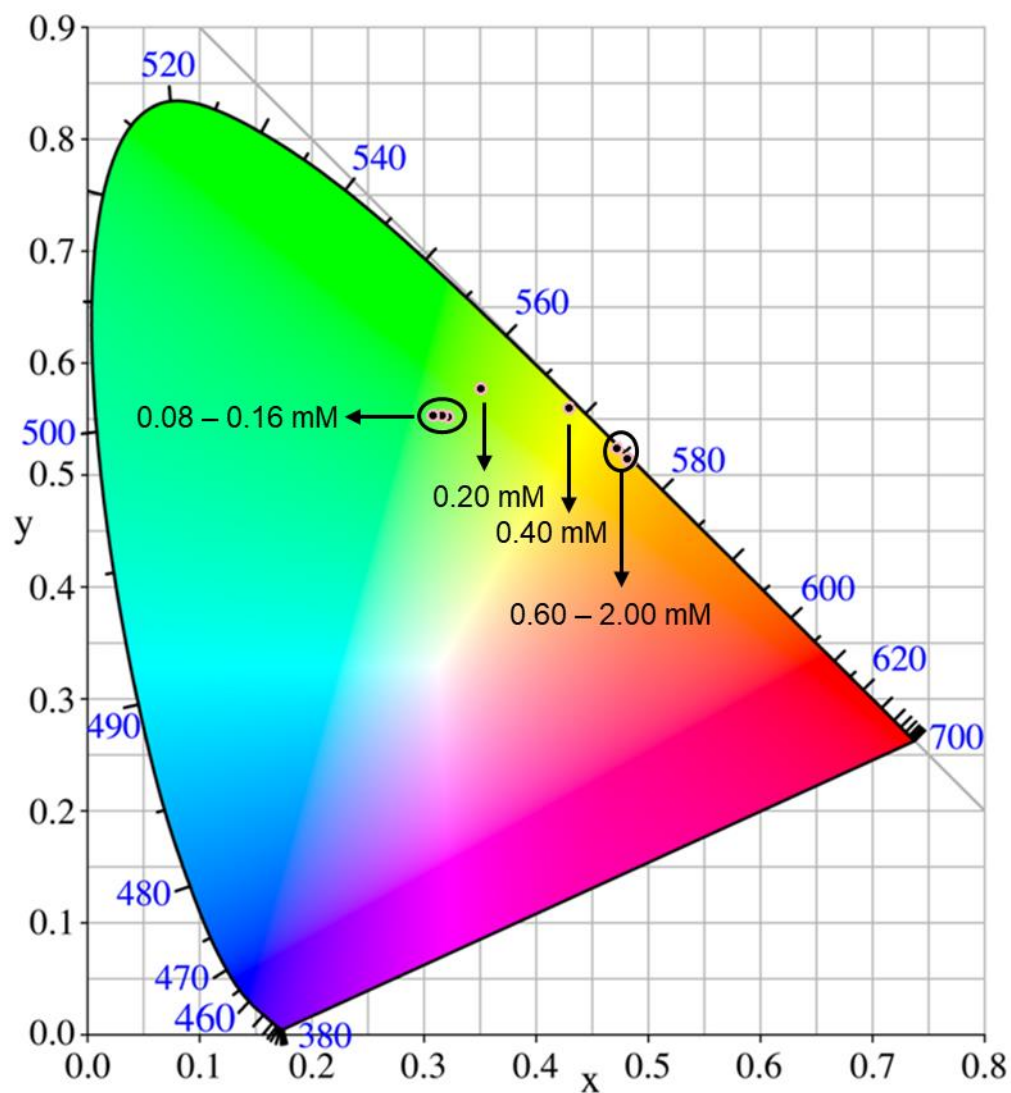

**Fig. S23.** Commission Internationale de l'Eclairage (CIE) 1931 chromaticity diagram for equimolar mixtures of **M1** and  $\text{Zn}(\text{OTf})_2$  monitored at different total concentrations (0.08, 0.12, 0.16, 0.20, 0.40, 0.80, 1.20, 1.40, 1.60, 1.80, 2.00 mM in DMF/ $\text{H}_2\text{O}$  (1/4, v/v)).

**Movie S1 (separate file).** Related to Fig. 4D. Dilution of an equimolar solution of **M1** + Zn(OTf)<sub>2</sub> monitored under UV light (365 nm; handheld UV lamp).

**Movie S2 (separate file).** Related to Fig. 7D. Dilution of a solution of **M1** monitored under UV light (365 nm; handheld UV lamp).

## SI References

1. M. Wang, *et al.*, Design and synthesis of self-included pillar[5]arene-based bis-[1]rotaxanes. *Chin. Chem. Lett.* **30**, 345-348 (2019).
2. Y.-T. Chan, C. N. Moorefield, G. R. Newkome, Synthesis, characterization, and self-assembled nanofibers of carbohydrate-functionalized mono- and di(2,2':6',2''-terpyridinyl)arenes. *Chem. Commun.* 6928-6930 (2009).
3. Z. M. Hudson, D. J. Lunn, M. A. Winnik, I. Manners, Colour-tunable fluorescent multiblock micelles. *Nat. Commun.* **5**, 3372 (2014).
